# Supplementary material for: Hierarchically porous monolithic silica with varying porosity using bis(trimethoxysilyl)arenes as precursors
Source: Royal Society of Chemistry journal article supplement (doi:10.1039/c6nj00758a), 2016-01-01
Supplement: c6nj00758a1.pdf [file c6nj00758a1.pdf]

## Hierarchically porous monolithic silica with varying porosity using bis(trimethoxy-silyl)arenes as precursors

Martin von der Lehr<sup>a</sup>, Rüdiger Ellinghaus<sup>a</sup>, Bernd M. Smarsly<sup>a</sup>

### Supporting Information:

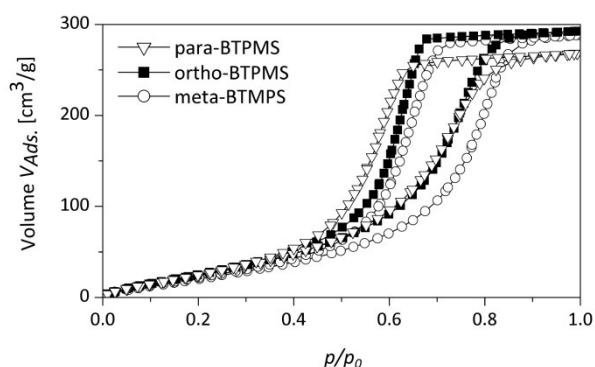

S 1 Dibromomethane sorption isotherms of silica hybrids containing the different isomers of BTPMS (5%, 0.355 g PEG).

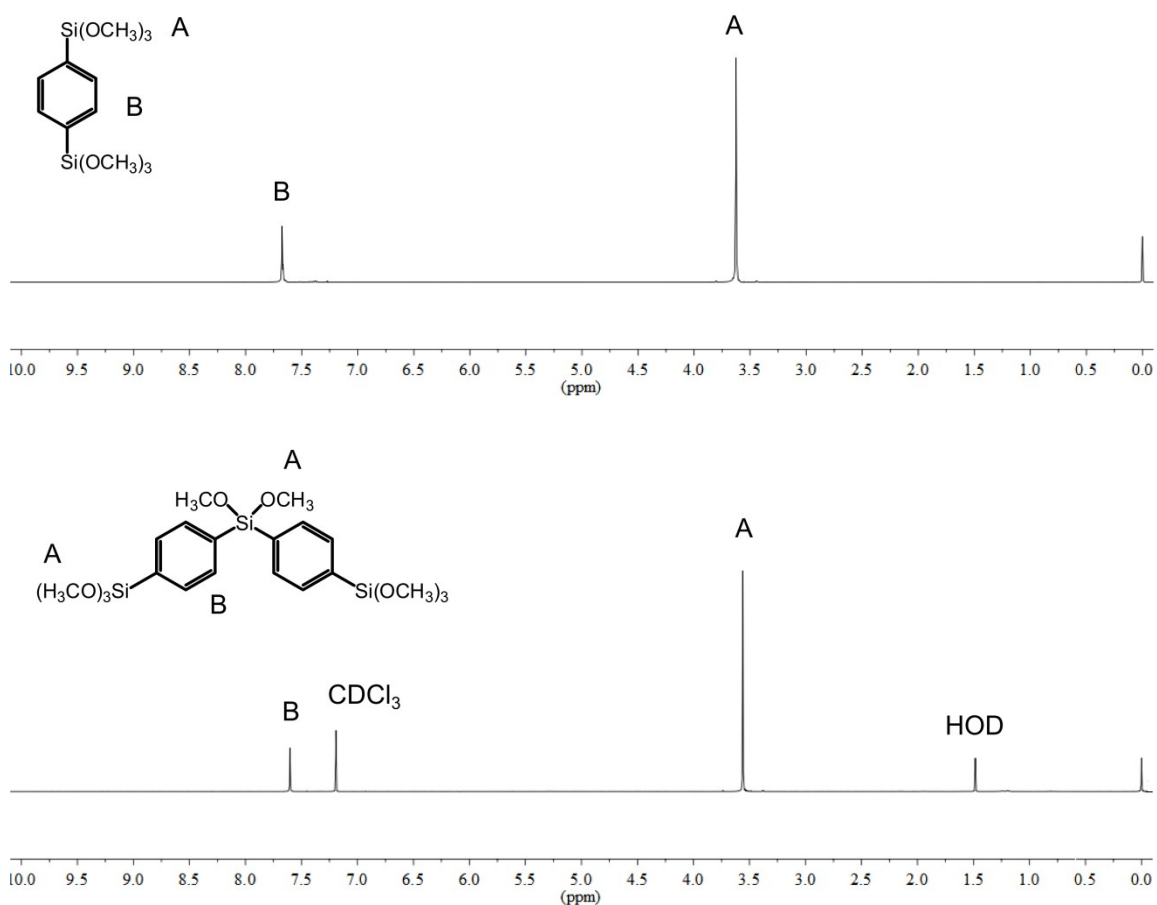

S 2 <sup>1</sup>H NMR spectra of *para*-isomers of used organosilica precursors BTMB/BTPMS (CDCl<sub>3</sub>, TMS)

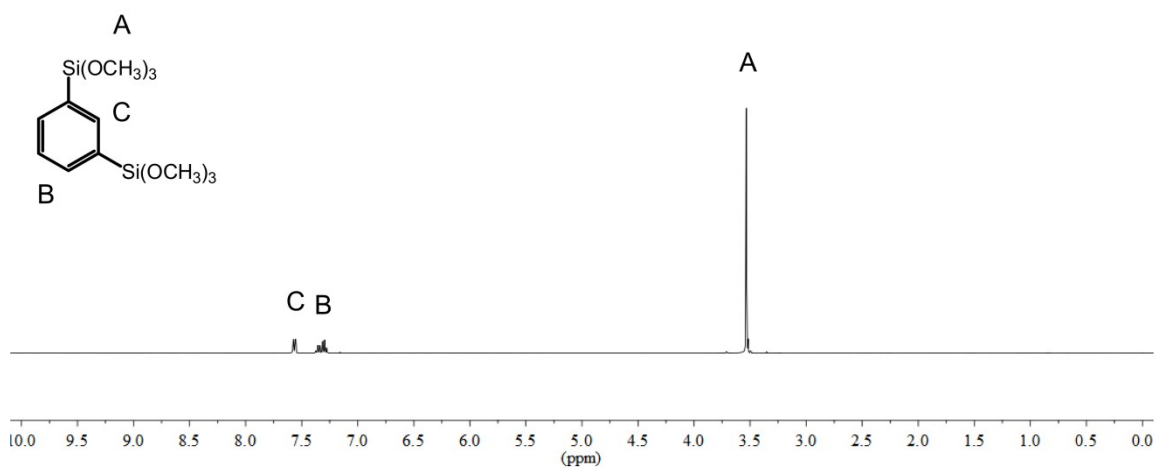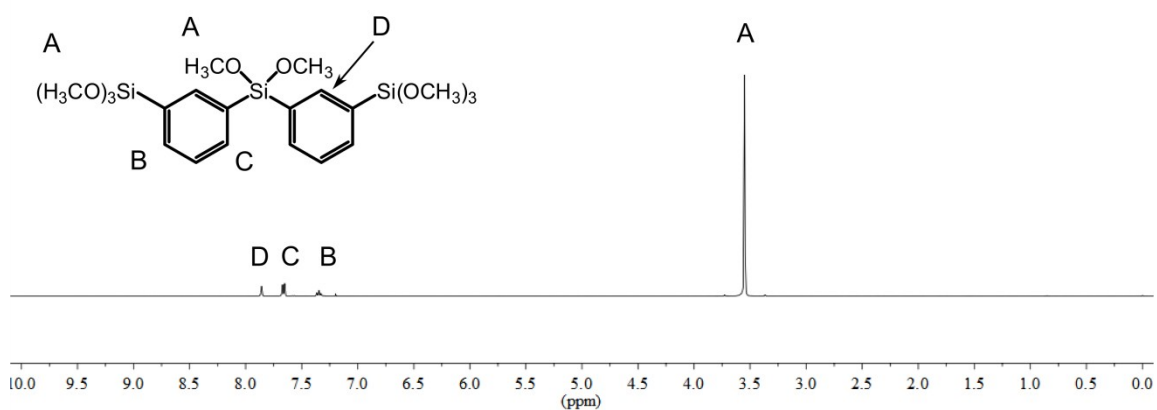

S 3 <sup>1</sup>H NMR spectra of *meta*-isomers of used organosilica precursors BTMB/BTPMS (CDCl<sub>3</sub>)

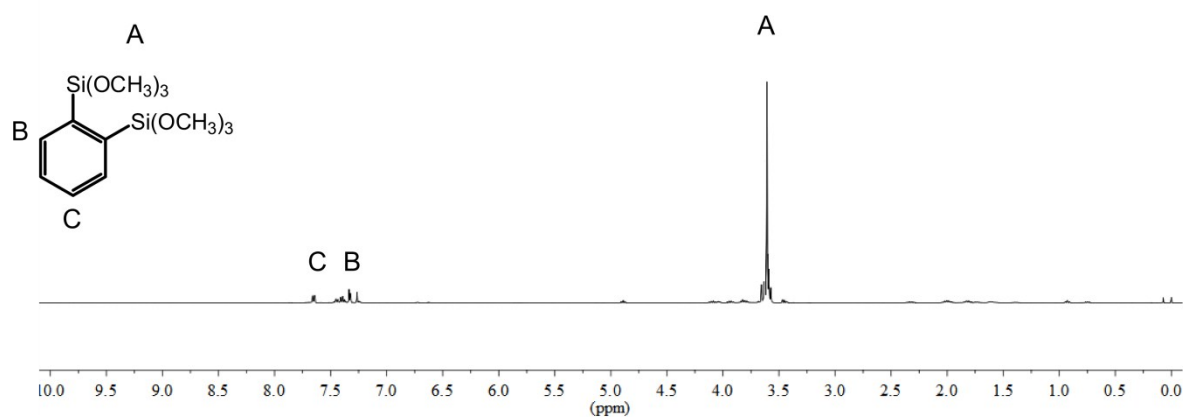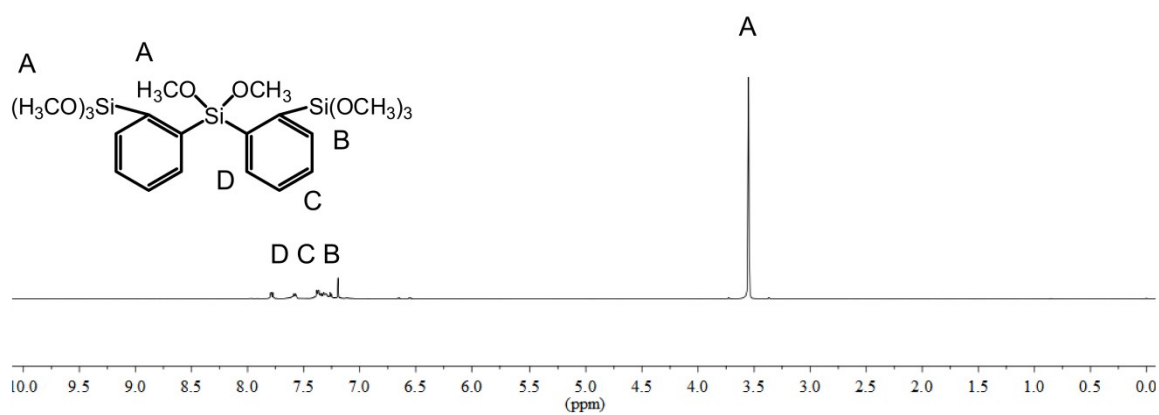

**S 4**  $^1\text{H}$  NMR spectra of *ortho*-isomers of used organosilica precursors BTMB/BTPMS ( $\text{CDCl}_3$ )

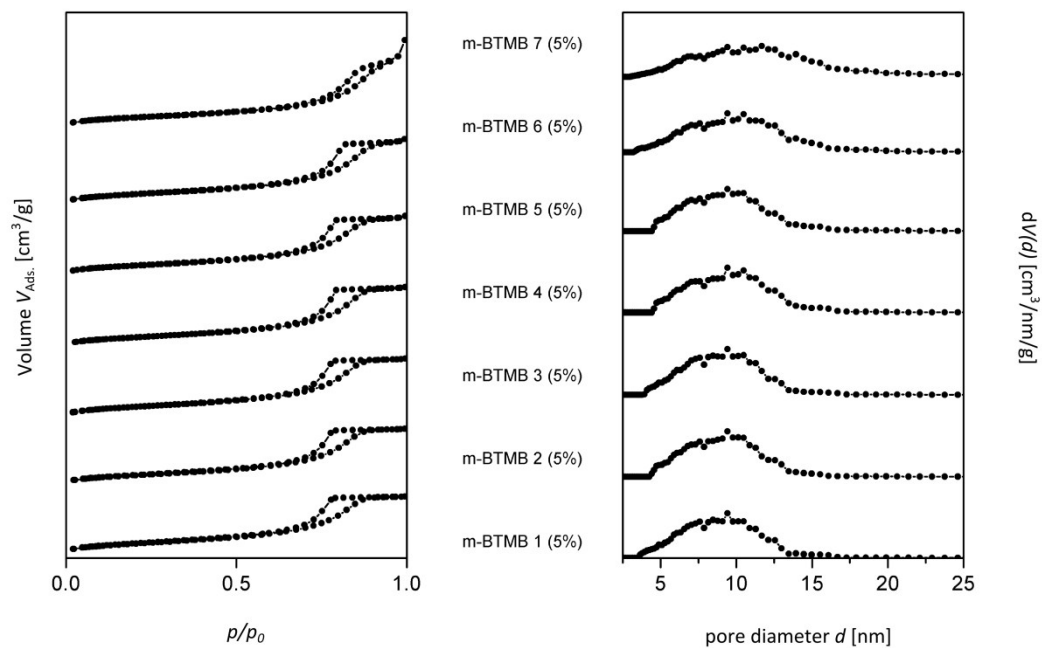

S 5 Physorption isotherms (left) and PSD (right) of *meta*-TMOS/BTMB hybrids (increasing amount PEG from bottom to top) and 5 % of organosilica precursor

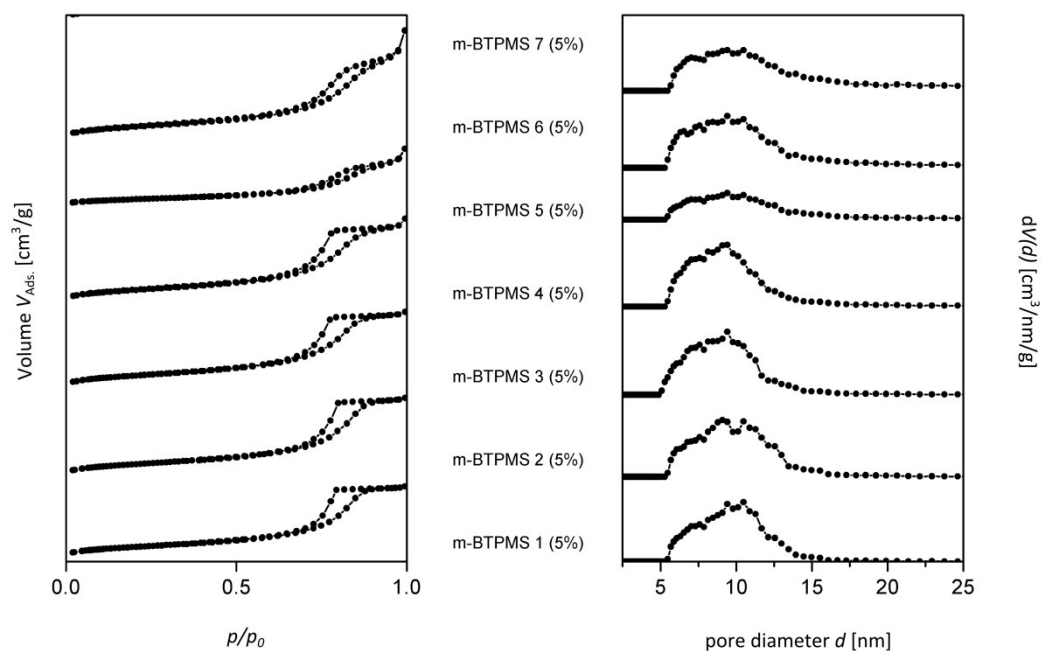

S 6 Physorption isotherms (left) and PSD (right) of *meta*-TMOS/BTPMS hybrids (increasing amount PEG from bottom to top) and 5 % of organosilica precursor

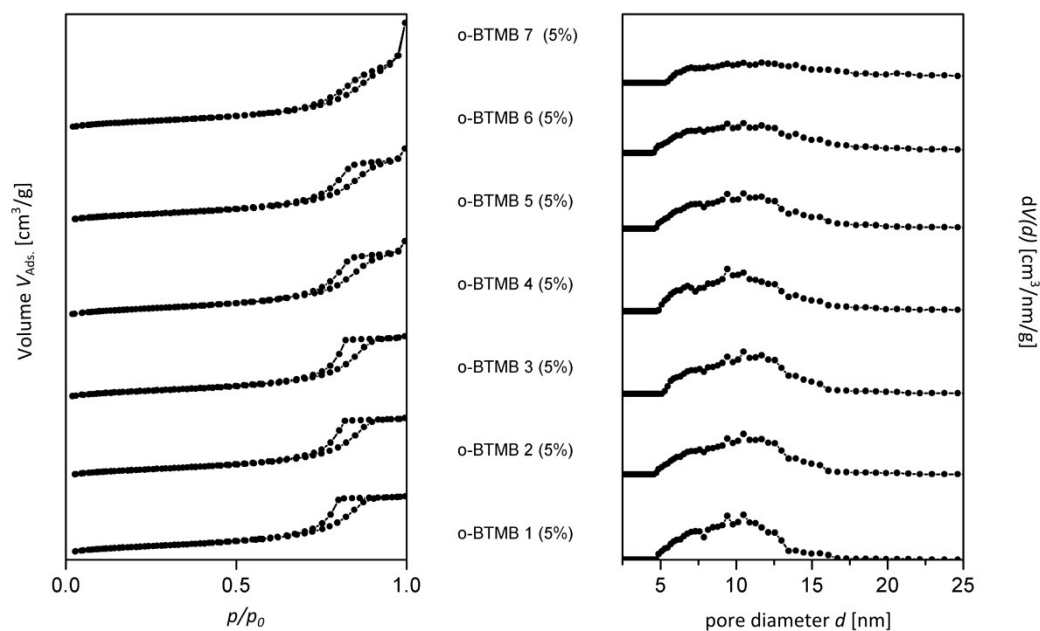

S 7 Physorption isotherms (left) and PSD (right) of *ortho*-TMOS/BTMB hybrids (increasing amount PEG from bottom to top) and 5 % of organosilica precursor

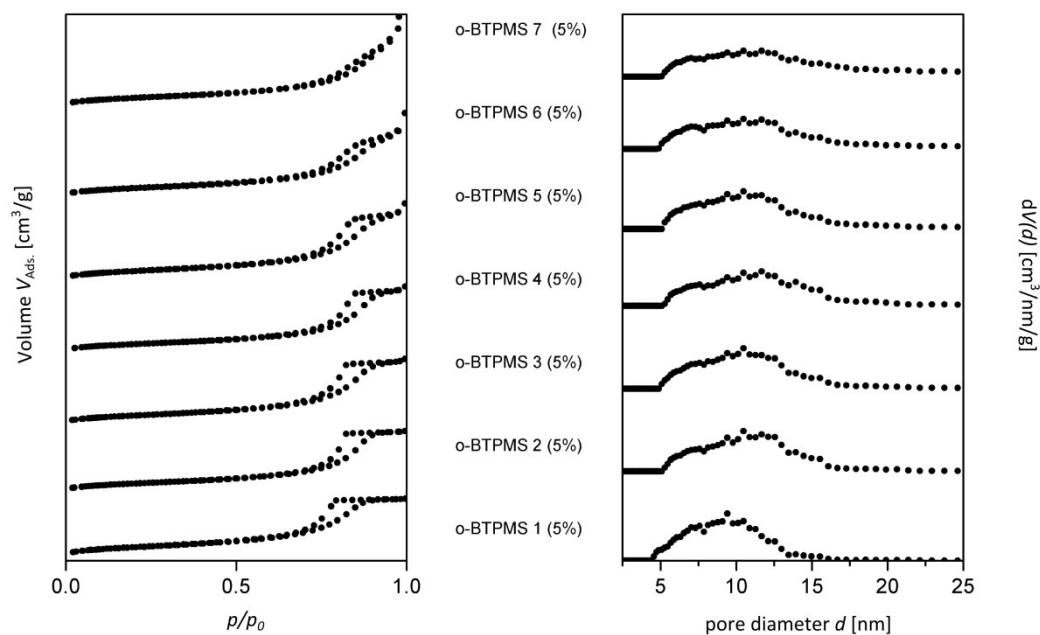

S 8 Physorption isotherms (left) and PSD (right) of *ortho*-TMOS/BTPMS hybrids (increasing amount PEG from bottom to top) and 5 % of organosilica precursor
